# Supplementary material
Source: Springer Nature journal article supplement (https://www.springermedizin.de/resource/supplementary/12985_2010_1082_MOESM3_ESM.pdf/9609104)

# ISAV RNA isolation

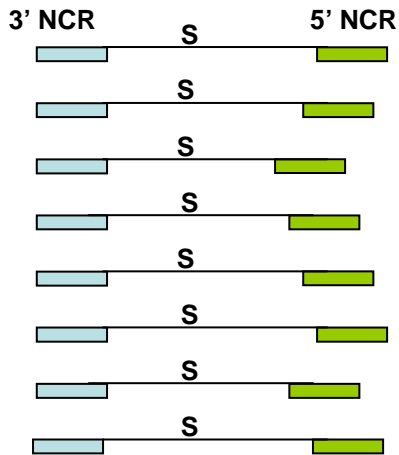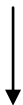

## RNA ligation

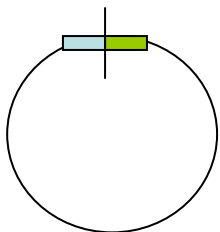

Reverse  
transcription

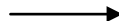

## PCR amplification

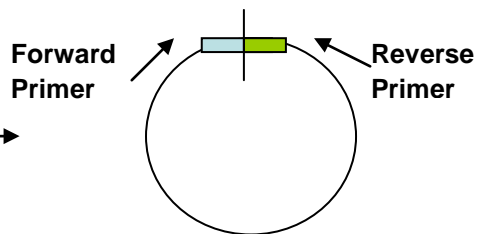

Amplified product

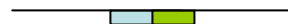

Sequencing

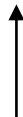

Supplement: MOESM3 [file 9609104]
